# Supplementary material for: Modulation of attention network activation under antidepressant agents in healthy subjects
Source: Oxford University Press journal article supplement (doi:10.1017/s1461145712001368), 2012-12-03
Supplement: s1461145712001368sup001.doc [file s1461145712001368sup001.doc]

**Supplementary Material**

**Modulation of attention network activation under antidepressant agents in healthy subjects**

Heiko Graf¹, Birgit Abler¹, Antonie Hartmann¹, Coraline D. Metzger2,3, Martin Walter2,3

¹ Department of Psychiatry, Ulm University, Ulm, Germany

² Department of Psychiatry, Otto von Guericke University, Magdeburg, Germany

3 Leibniz Institute for Neurobiology, Magdeburg, Germany

**Supplementary Results**

**Specific side effects reported for each treatment group**

Psychopharmacological side effects were assessed by one of the study physicians within a medical interview with open questions and a structured part (UKU side-effects scale, (Lingjaer*d*e et al, 1987)). Regarding the UKU, 56% of the subjects reported complaints of any kind under placebo within a wide range of different symptoms. Complaints of any side effects were more frequent under paroxetine (83% of subjects) than under bupropion (67% of subjects) but differences in the number of subjects with complaints did not reach significance between treatments (F(2,34)=2.58, p=0.09, see Figure S1). It is also of note, that only one subject reported “depression”, only under paroxetine, which led us to the conclusion that neural responses did not relate to changes in mood within our sample of healthy volunteers.

**Figure S1:** Specific side effects assessed by the UKU-score reported for each treatment group.


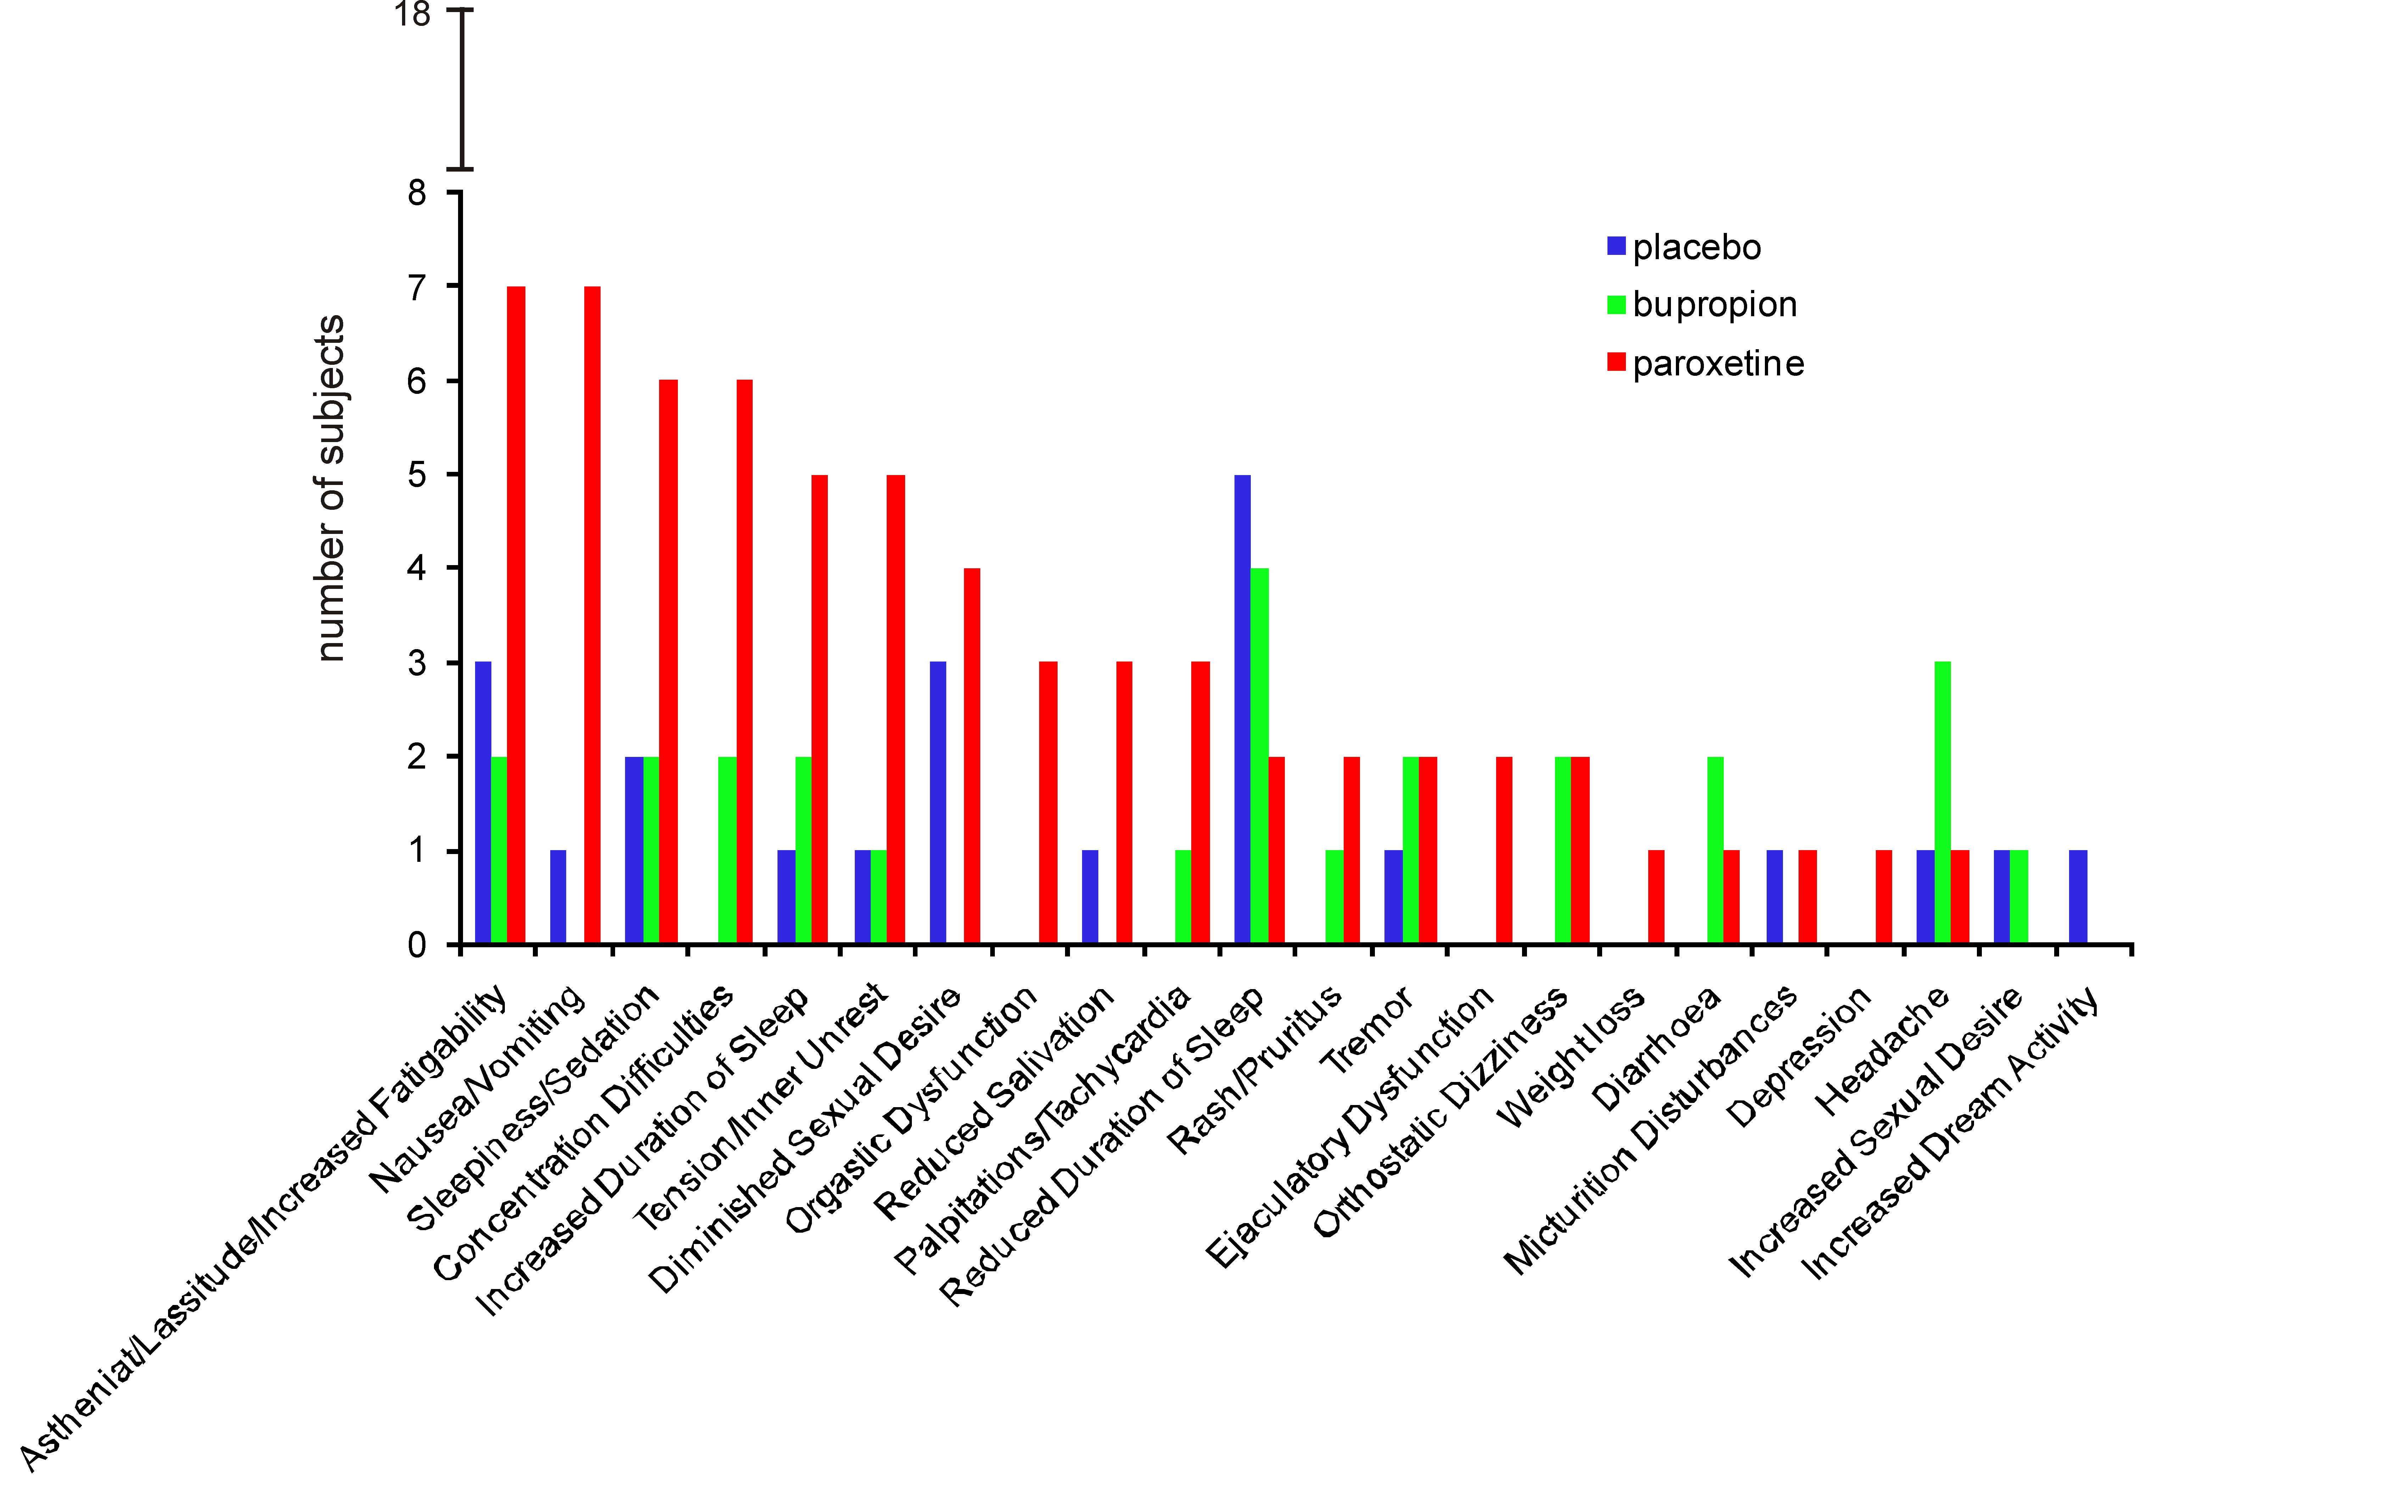


Moreover, subjects filled the Stanford Sleepiness Scale (SSS, (Hodes, 1973)). This seven-point Likert-type scale (scoring test-retest reliability 0.88; validity of mean SSS using the Wilkinson addition and vigilance tests was reported at correlation of 0.68) was used to measure differences in sedation between each treatment condition and has descriptors ranging from “feel active, vital alert, or wide awake” (score=1) to “no longer fighting sleep, sleep onset soon and having dream-like thoughts” (score=7). A one-way ANOVA (F(2,34)=2.06; p=0.14) revealed that subjective ratings of sedation did not differ between treatments (mean values placebo (SD): 1.83 (0.92) / bupropion: 1.72 (0.96) / paroxetine: 2.33 (1.41)).

**Results of the Massachusetts General Hospital Sexual Function Questionnaire (MGH-SFQ):**

A repeated measurements ANOVA on average scores of the MGH-SFQ-questionnaire revealed significantly different subjective sexual functioning between medications (F(2,34)=5.05, p=0.01). Post-hoc paired t-tests confirmed significantly higher overall scores for decreased sexual function under paroxetine in comparison to placebo or bupropion whereas no significant differences were observed comparing bupropion against placebo (for details see (Abl*e*r et al, 2011).

**Table S1:** Main effects contrasting expectancy periods of erotic versus non-erotic pictures under placebo (p<0.05; FDR corrected)

| **Anatomical Region** | **erotic versus non-erotic expectancy period** | | |
| --- | --- | --- | --- |
| **L/R** | **T** | **x/y/z** |
| ***Cingulate cortex:***  Pregenual ACC, BA 24  Anterior MCC, BA 24  Posterior MCC, BA 32  PCC  ***Subcortical activations:***  Raphe nuclei  Ventral striatum  Thalamus  Hypothalamus  Hippocampus  ***Cortical activations:***  Middle frontal gyrus BA 9  Middle frontal gyrus, BA 10  Middle frontal gyrus, BA 46  Anterior insula  Medial insula  Posterior insula  Superior temporal gyrus, BA 22  Medial temporal gyrus, BA 21  Inferior parietal lobe, BA 40  Fusiform gyrus, BA 19  ***Cerebellum*** | L  R  L  R  L  R  L  R  L  R  L  R  L  R  L  R  L  R  L  L  R  L  R  L  R  L  R  L  R  L  R  L  R  L  R  L  R  R  L  R | 2.51  4.09  5.34  7.86  4.25  6.94  4.06  3.84  3.02  5.57  5.18  4.76  5.06  4.03  7.01  5.73  4.58  4.21  4.18  2.66  6.28  2.86  5.62  4.29  5.23  5.02  5.41  3.68  3.34  4.90  3.99  4.12  3.31  3.84  5.44  5.15  5.36  5.32  3.66  2.62 | -4/36/0  10/36/-2  -10/26/22  8/24/24  -8/12/36  8/16/28  -10/-26/36  16/-20/36  -10/-50/22  4/-44/14  -4/-30/-24  6/-30/-24  -16/0/4  14/6/-2  -10/-14/4  8/-16/0  -6/0/-8  6/0/-6  -24/-28/-8  -44/28/36  26/22/36  -26/50/10  38/50/10  -32/36/16  34/46/22  -30/18/4  30/18/2  -34/-2/6  38/-6/2  -32/-12/2  34/-10/8  -50/-14/0  50/-20/4  -54/-56/6  46/-56/6  -52/-36/18  48/-26/26  12/-56/8  -22/-66/-18  14/-70/-32 |

The table shows results of post-hoc t-tests (p<0.05; FDR corrected) with T-values and significant peak voxels.

L, left; R, right, T, T-value, x/y/z are peak coordinates in Montreal Neurological Institute space; ACC, anterior cingulate cortex; MCC, midcingulate cortex; PCC, posterior cingulate cortex; BA, Brodman Area

**Table S2:** Main effects contrasting erotic versus non-erotic pictures in the stimulus presentation period under placebo (p<0.05; FDR corrected).

| **Anatomical Region** | **all erotic > all non-erotic pictures** | | |
| --- | --- | --- | --- |
| **L/R** | **T** | **x/y/z** |
| ***Cingulate cortex:***  Pregenual ACC, BA 24  Anterior MCC, BA 24  Posterior MCC, BA 32  PCC  ***Subcortical structures:***  Midbrain  Ventral striatum  Globus pallidum  Extended amygdala  Ventrolateral thalamus  Nucleus caudate  Hypothalamus  Hippocampus  ***Cortical activations:***  Inferior frontal gyrus, BA 47  Inferior frontal gyrus, BA 11  Inferior frontal gyrus, BA 44  Medial frontal cortex, BA 6  Medial insula  Inferior parietal lobe, BA 40  Fusiform gyrus, BA 19  Parahippocampus  ***Cerebellum*** | R  L  L  R  L  R  R  R  L  R  L  R  L  R  L  R  L  R  L  R  L  R  R  L  L  R | 6.63  4.94  5.66  4.18  7.58  5.73  5.17  4.60  2.76  4.44  5.88  5.78  5.66  4.34  4.20  4.31  4.75  4.74  7.47  4.16  5.04  5.57  5.28  6.17  5.53  5.75  5.50  4.95  4.68  5.16  3.66  3.76  4.75 | 0/38/6  4/28/18  12/2/24  -4/-8/28  0/-36/24  0/-12/-14  -10/8/-6  10/12//-4  14/0/4  -16/-4/-10  14/-4/-8  2/-6/4  12/2/24  0/-8/-12  30/-28/-6  -24/28/-16  34/22/-4  -18/28/-2  22/30/-12  -28/6/30  48/8/28  -42/-2/32  42/2//34  -36/14/-10  32/14/-12  -34/-38/34  32/-40/36  -44/-44/-14  42/-48/-16  30/-36/2  -34/-34/-2  -22/-72/-30  16/-76/-22 |

The table shows results of post-hoc t-tests (p<0.05; FDR corrected) with T-values and significant peak voxels. In this contrast, erotic and non-erotic pictures were collapsed irrespective of preceding expectancy.

L, left; R, right, T, T-value, x/y/z are peak coordinates in Montreal Neurological Institute space; ACC, anterior cingulate cortex; MCC, midcingulate cortex; PCC, posterior cingulate cortex; BA, Brodman Area

**References**

**Abler B, Seeringer A, Hartmann A, Gron G, *et al*** (2011). Neural correlates of antidepressant-related sexual dysfunction: a placebo-controlled FMRI study on healthy males under subchronic paroxetine and bupropion. *Neuropsychopharmacology* **36**(9), 1837-1847.

**Hodes E, Zarcone V, Smythe H, Phillips R, et al.** (1973). Quantification of sleepiness: a new approach. *Psychophysiology* **10**, 431-436.

**Lingjaerde O, Ahlfors UG, Bech P, Dencker SJ, et al.** (1987). The UKU side effect rating scale. A new comprehensive rating scale for psychotropic drugs and a cross-sectional study of side effects in neuroleptic-treated patients. *Acta Psychiatrica Scandinavica* **334**, 1-100.
